# Supplementary material for: Generation of isogenic Propionyl-CoA carboxylase beta subunit (PCCB) deficient induced pluripotent stem cell lines
Source: PubMed Central journal article supplement — Stem Cell Res. Author manuscript; Available in PMC 2020 Nov 4. (PMC7640943; doi:10.1016/j.scr.2020.101953), 2020-08-08
Supplement: NIHMS1639675-supplement-2.pdf [file NIHMS1639675-supplement-2.pdf]

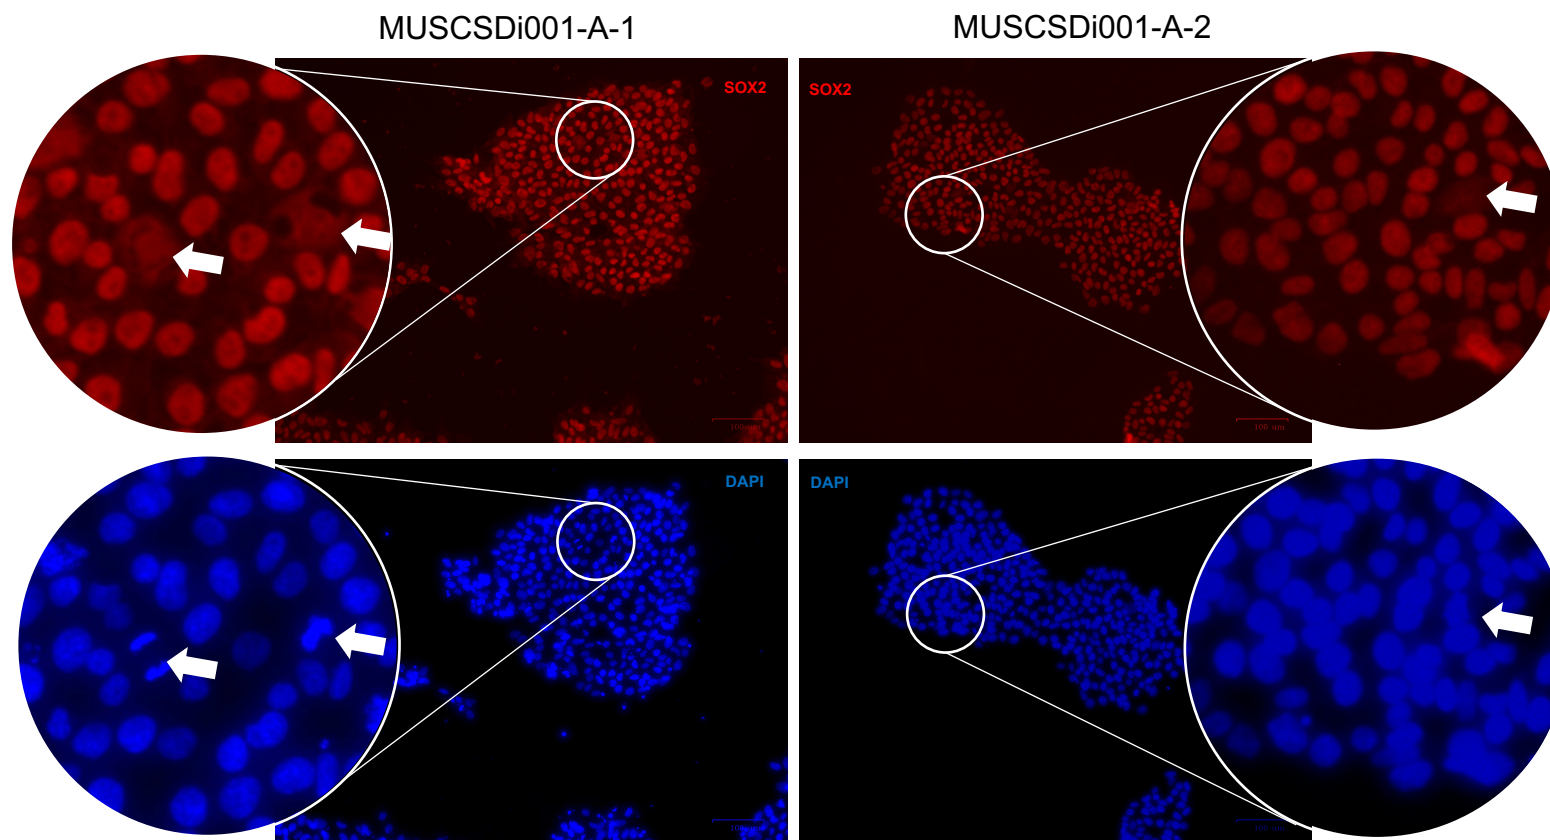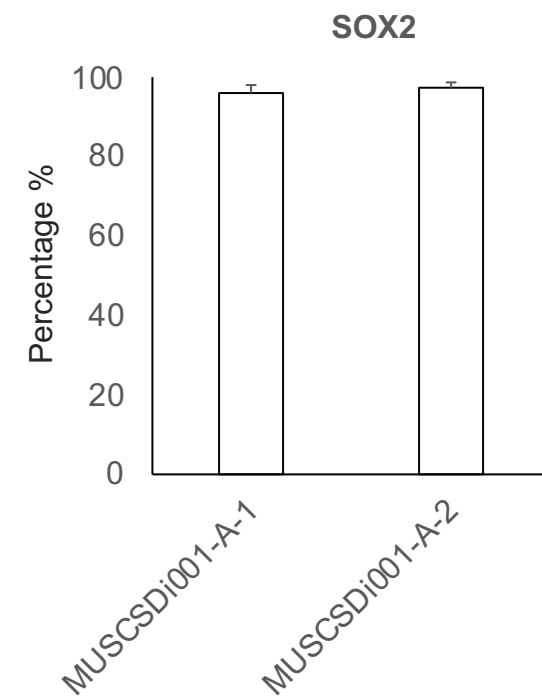

**Supplementary Fig. 1: Quantification of SOX2 expression.** Total cell number and negative cells counted manually using Image J software and the positive expression presented as percentage.
